# Supplementary material for: Leukocyte transcriptional signatures dependent on LPS dosage in human endotoxemia
Source: PubMed Central journal article supplement — J Leukoc Biol. 2019 Jul 7;106(5):1153–60. doi: 10.1002/JLB.4A0219-050R (PMC6852106; doi:10.1002/jlb.4a0219-050r), 2019-07-07
Supplement: JLB-106-1153-s001.pdf [file JLB-106-1153-s001.pdf]

A

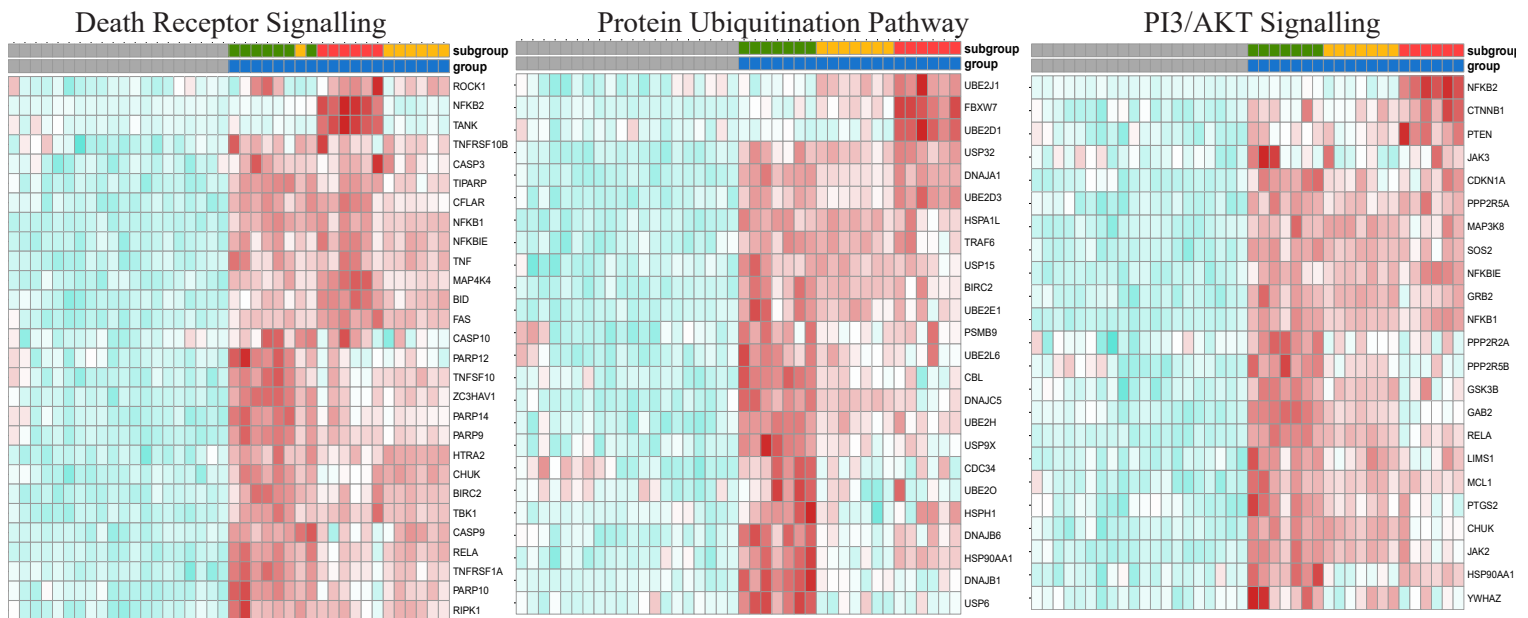

B

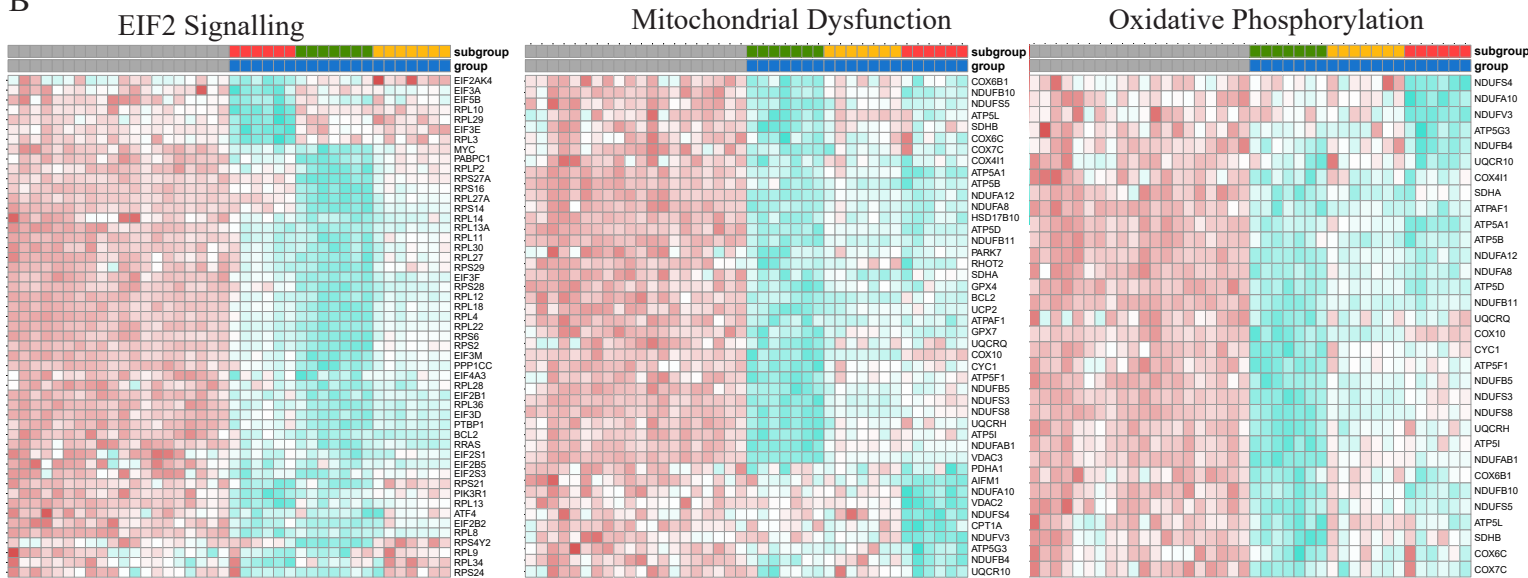

Pre-LPS Post-LPS 4ng/kg 2ng/kg 1ng/kg

Supplementary Figure 1: LPS dose-dependent transcriptional response pathways. (A,B) Heatmap plots of the genes in the top overexpressed and underexpressed enriched pathways. Columns depict samples; rows depict gene expression indices. Red denotes overexpression; blue denotes underexpression.
