# Supplementary material for: Leukocyte transcriptional signatures dependent on LPS dosage in human endotoxemia
Source: PubMed Central journal article supplement — J Leukoc Biol. 2019 Jul 7;106(5):1153–60. doi: 10.1002/JLB.4A0219-050R (PMC6852106; doi:10.1002/jlb.4a0219-050r), 2019-07-07
Supplement: JLB-106-1153-s002.pdf [file JLB-106-1153-s002.pdf]

1 **Supplementary Tables:**

2 **Supplementary Table 1:**

|                          | <b>1ng/kg</b> | <b>2ng/kg</b>   | <b>4ng/kg</b> |
|--------------------------|---------------|-----------------|---------------|
| Samples before LPS (T=0) | 7             | 6               | 7             |
| Sample after LPS (T=4)   | 7             | 6               | 7             |
| Platform                 | Illumina V3   | Affymetrix U219 | Illumina V3   |

3 **Table1:** Characteristics of the human endotoxemia cohorts with differing LPS doses

4  
5 **Supplementary Table 2:**

| <b>Parameters</b>               | <b>Pre-LPS</b>   | <b>Post-LPS</b>   |                  |                  |
|---------------------------------|------------------|-------------------|------------------|------------------|
|                                 |                  | <b>1ng</b>        | <b>2ng</b>       | <b>4ng</b>       |
| Leukocytes ( $\times 10^9/L$ )  | 5 (4.45-5.32)    | 10.2 (9.04-11.71) | 7.8 (7.32-8.24)  | 8.7 (6.66-9.60)  |
| Neutrophils ( $\times 10^9/L$ ) | 2.75 (2.32-3.06) | 9.5 (8.27-10.84)  | 7.26 (6.82-7.70) | 8.39 (5.37-9.35) |
| Lymphocytes ( $\times 10^9/L$ ) | 1.54 (1.46-1.76) | 0.56 (0.50-0.62)  | 0.31 (0.23-0.39) | 0.23 (0.19-0.30) |
| Monocytes ( $\times 10^9/L$ )   | 0.45 (0.42-0.49) | 0.21 (0.13-0.33)  | 0.19 (0.08-0.33) | 0.05 (0.02-0.07) |

6 **Table2:** Median (95% CI) of differentials leukocytes count on Pre-LPS vs. Different Post-LPS

7 doses

8
